# Supplementary material for: Self-assembled monolayers of alendronate on Ti6Al4V alloy surfaces enhance osteogenesis in mesenchymal stem cells
Source: PubMed Central journal article supplement (PMC4965747; doi:10.1038/srep30548), 2016-07-29
Supplement: srep30548-s1.pdf [file srep30548-s1.pdf]

# Self-assembled monolayers of alendronate on Ti6Al4V alloy surfaces enhance osteogenesis in mesenchymal stem cells

Luis Rojo Borzo Gharibi, Robert McLister, Brian J Meenan and Sanjukta Deb

## Supplementary info

a

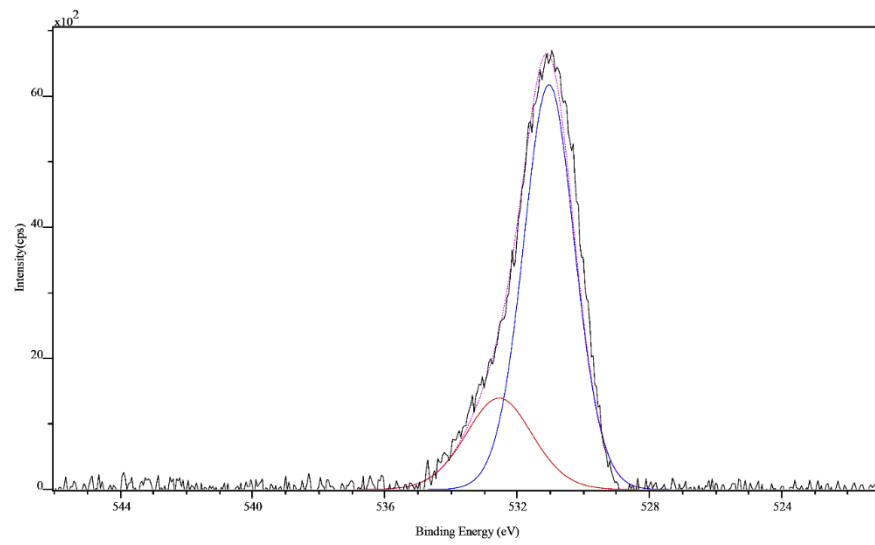

b

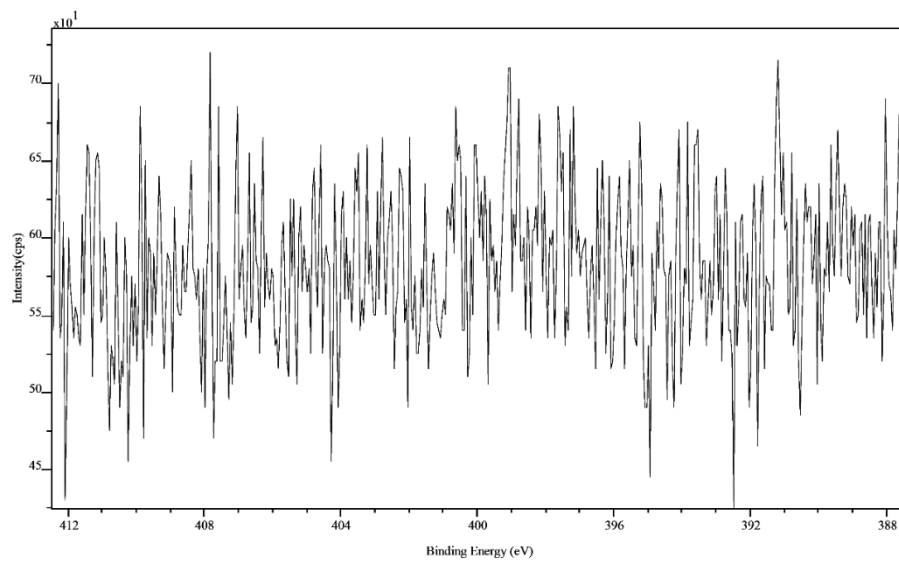

c

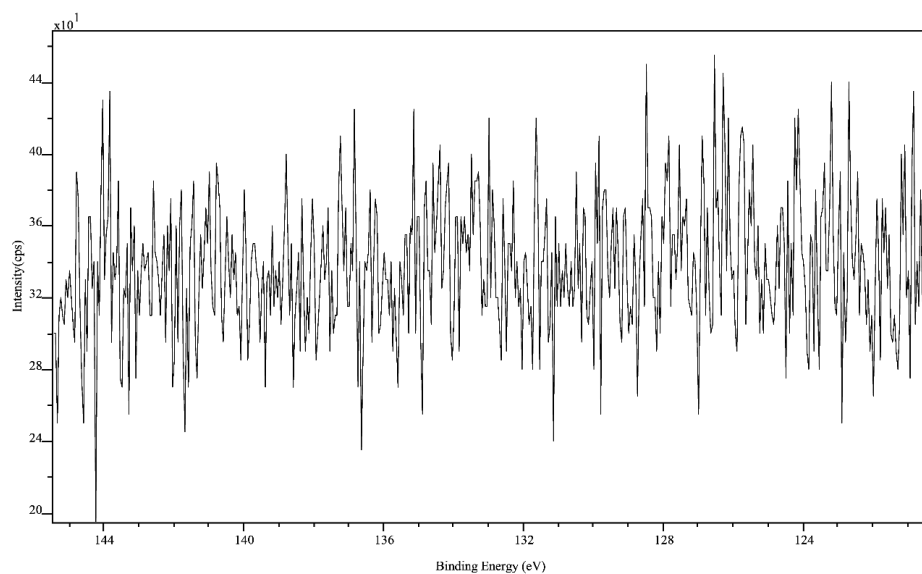

**Figure S1.** High-resolution XPS spectra of a: O 1s, b: N 1s, c: P 2p of P-Etch samples.

**a**

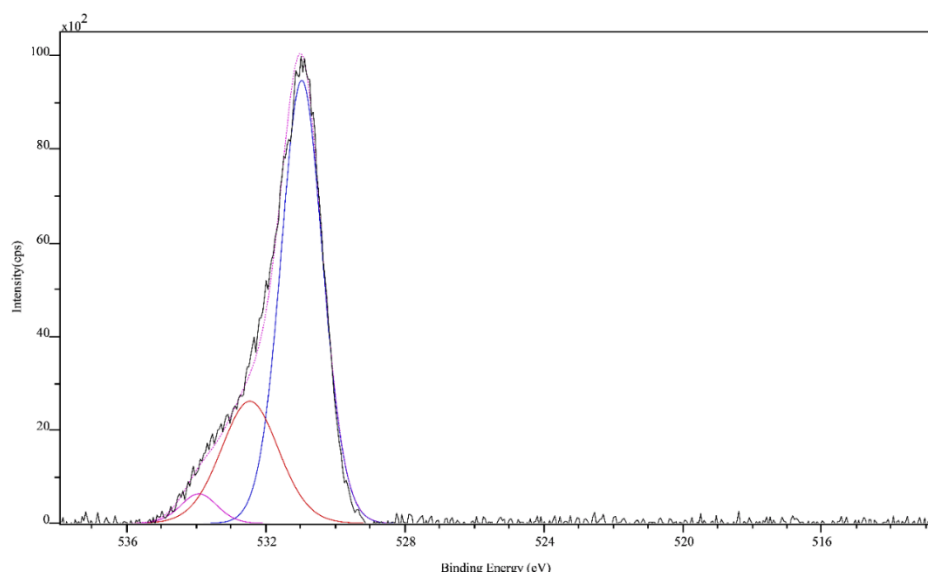

**b**

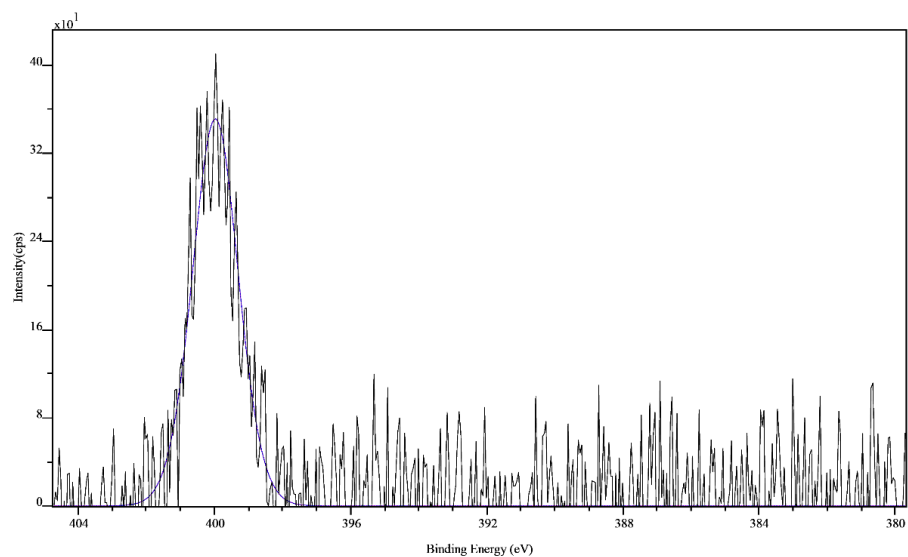

C

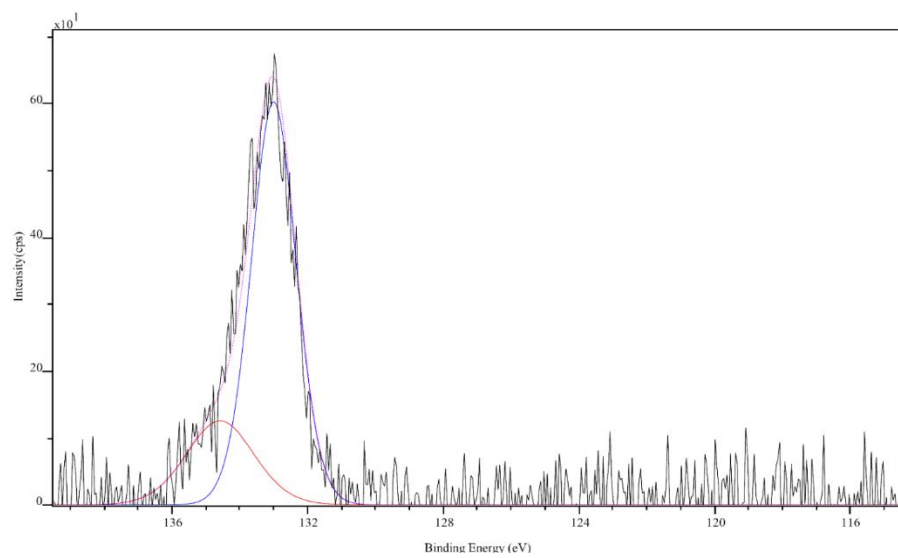

**Figure S2.** High-resolution XPS spectra of a: O 1s, b: N 1s, c: P 2p of P-ALE samples.
